# Supplementary material for: System dynamics perspective: lack of long-term endogenous feedback accounts for failure of bucket models to replicate slow hydrological behaviors
Source: Copernicus journal article supplement (doi:10.5194/hess-2024-7), 2024-01-29
Supplement: Supplementary file 1 [file hess-2024-7-supplement.pdf]

## Supplementary materials

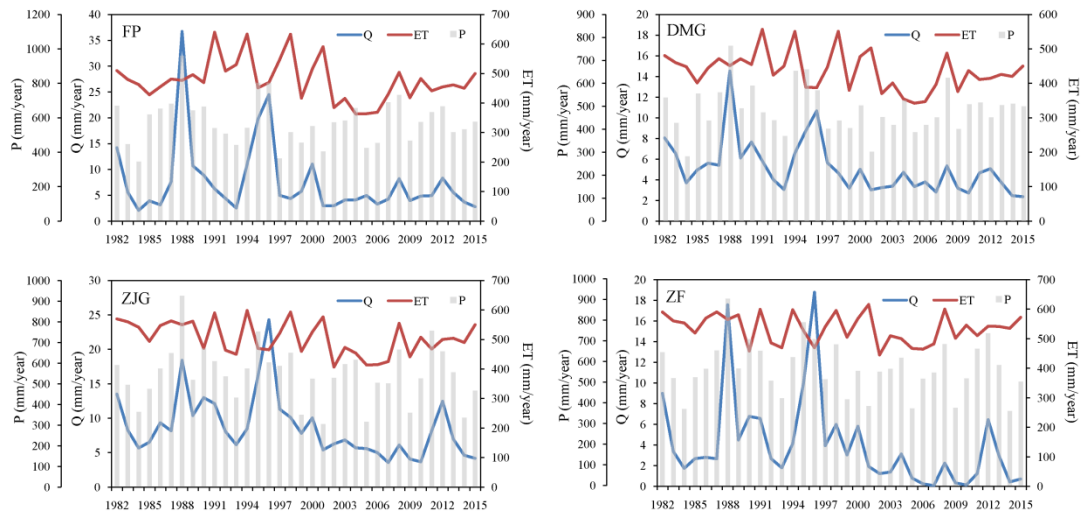

Figure S1 Rainfall, ET, and streamflow in the four catchments of study area.

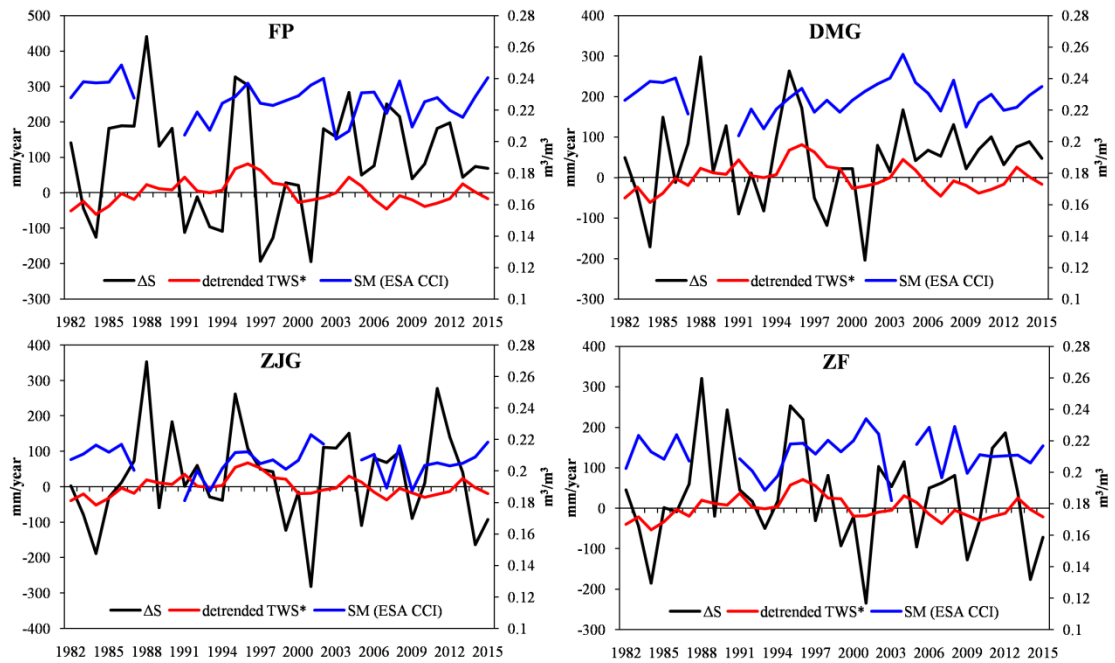

Figure S2 Comparison of water budget ( $\Delta S$ , unit: mm/year), detrended TWSA (unit: mm/year), and satellite-derived soil moisture (unit:  $\text{m}^3/\text{m}^3$ ).

\*Details of detrended TWSA data can be obtained from Li et al., 2021.

(a)

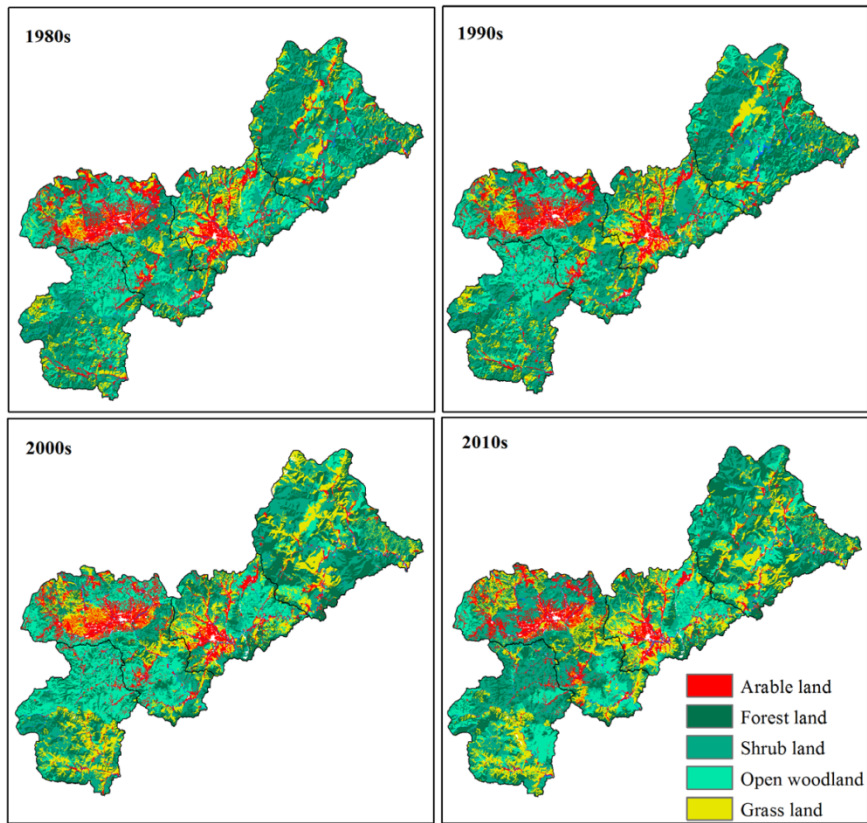

(b)

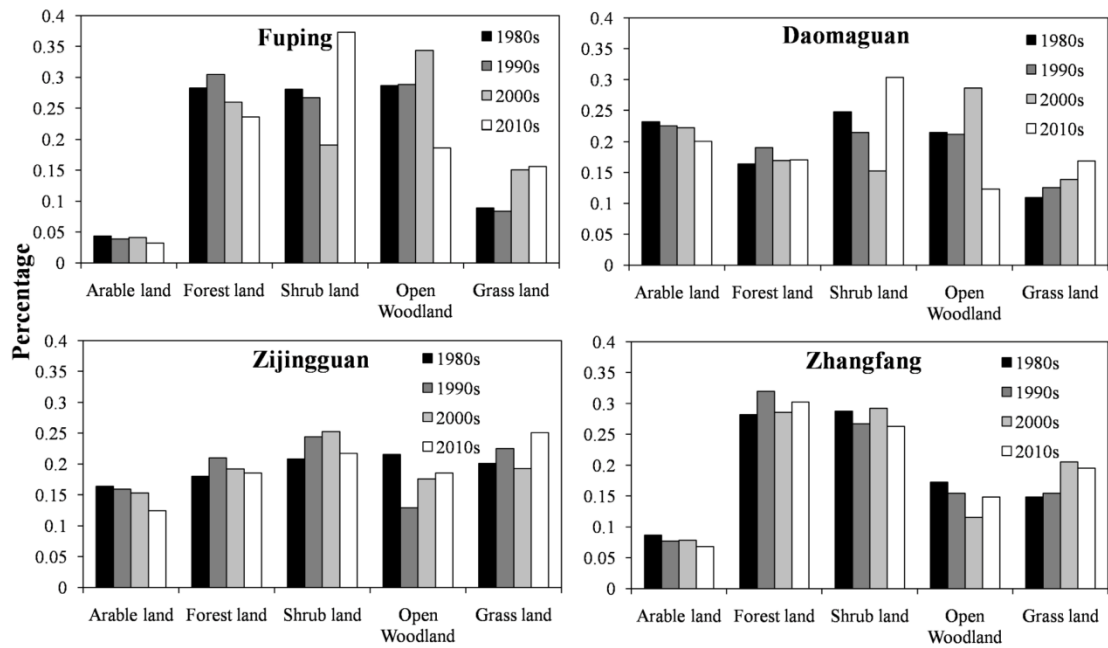

Figure S3 Land use change from 1980s to 2010s

### P: 1982-2015

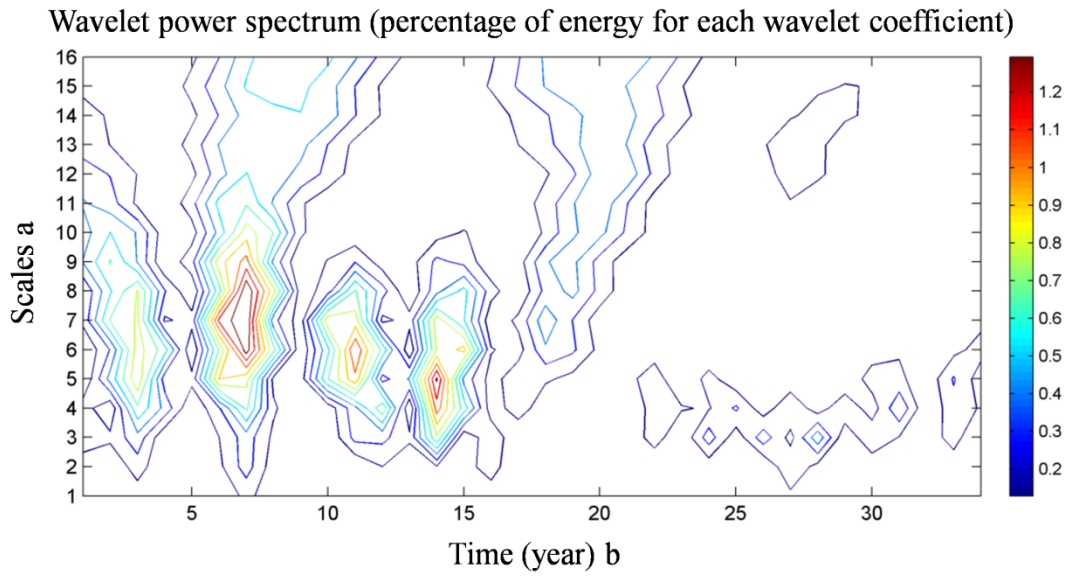

Figure S4 Wavelet analysis of rainfall in the period of 1982-2015. The rainfall is the average of four catchments.

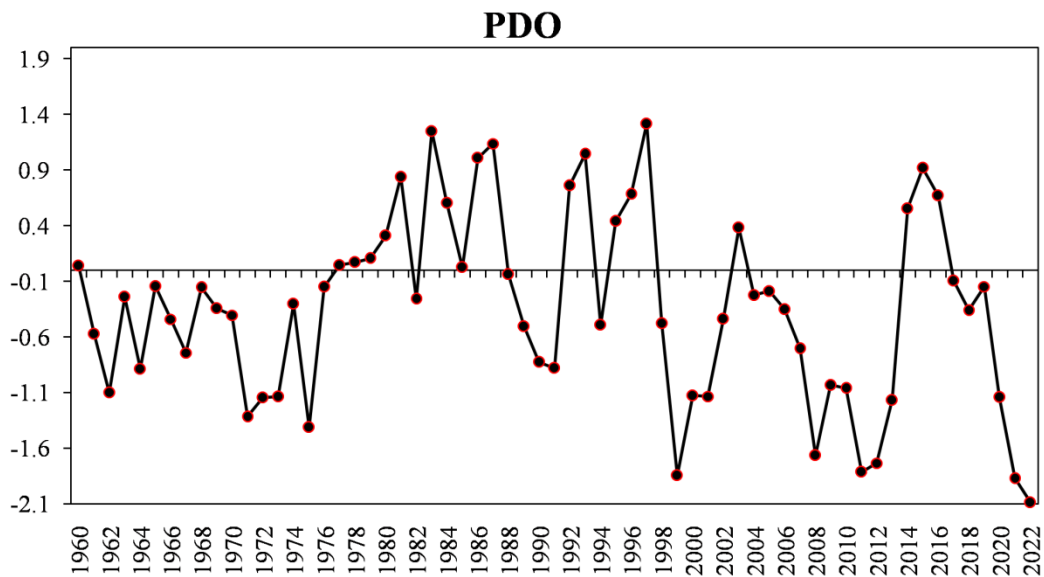

Figure S5 The PDO Index from 1960 to 2022. The index was downloaded from website of <https://www.ncdc.noaa.gov/teleconnections/pdo/>

### DMG

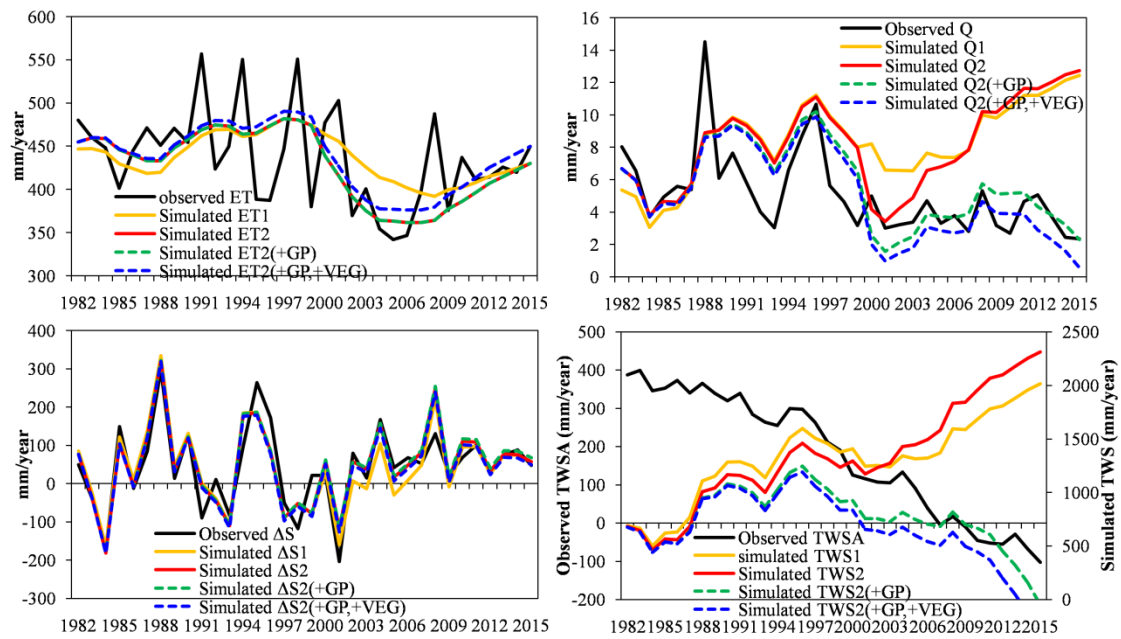

Figure S6 Observed and simulated evapotranspiration (ET), streamflow (Q), water budget ( $\Delta S$ ) and total water storage (TWS) using system dynamics approach for the DMG catchment. Yellow and red lines indicate the simulation without human intervention (GP=0 and VEG=0), with respectively fixed and varying desired soil moisture (ESMS). Green dashed line indicates simulation with groundwater pumpage (GP), which increased at an exponential rate. Blue dash line is the simulation with GP and vegetation change (VEG) which is increasing at a linear rate.

### ZJG

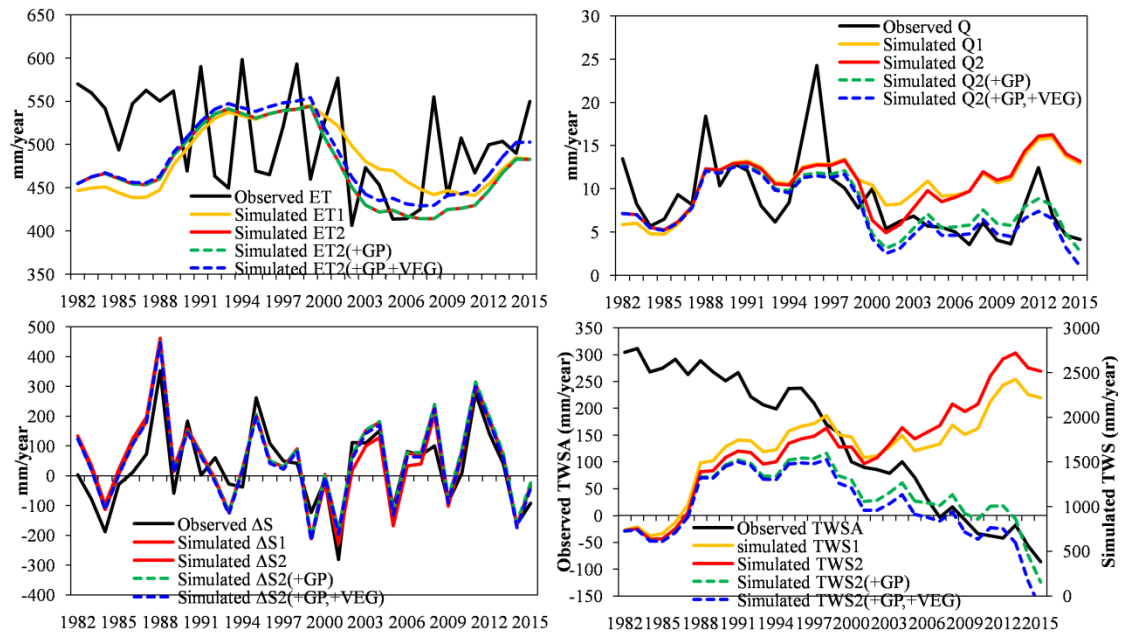

Figure S7 Same as above but for ZJG catchment

### ZF

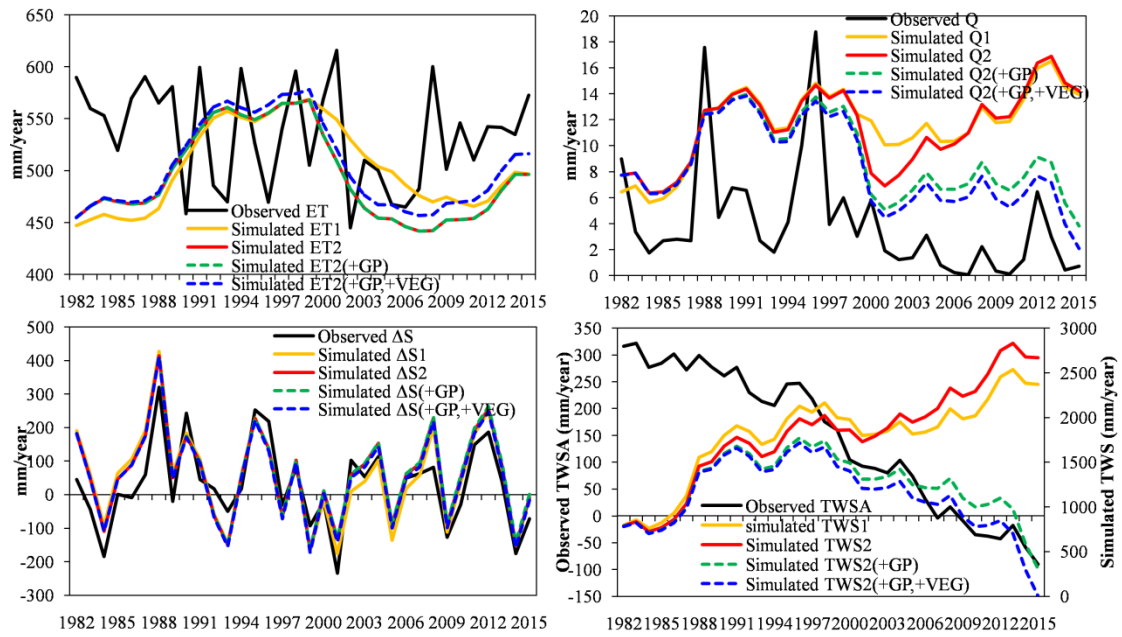

Figure S8 Same as above but for ZF catchment

Table S1 Details of 22 Global Climate Models (GCMs) applied in the study

| No. | Short Name | Full Name     | Institute           | Country   |
|-----|------------|---------------|---------------------|-----------|
| 1   | ACC1       | ACCESS-CM2    | CSIRO-ARCCSS-BoM    | Australia |
| 2   | ACC2       | ACCESS-ESM1   | CSIRO               | Australia |
| 3   | BCC        | BCC-CSM2-MR   | BCC                 | China     |
| 4   | Can1       | CanESM5       | CCCMA               | Canada    |
| 5   | Can2       | CanESM5-CanOE | CCCMA               | Canada    |
| 6   | CNR1       | CNRM-ESM2-1   | CNRM-CERFACS        | France    |
| 7   | CNR2       | CNRM-CM6-1    | CNRM-CERFACS        | France    |
| 8   | CNR3       | CNRM-CM6-1-HR | CNRM-CERFACS        | France    |
| 9   | ECE1       | EC-Earth3-Veg | EC-Earth-Consortium | EU        |
| 10  | ECE2       | EC-Earth3     | EC-Earth-Consortium | EU        |
| 11  | FGOA       | FGOALS-g3     | CAS                 | China     |
| 12  | GFD        | GFDL-ESM4     | NOAA-GFDL           | USA       |
| 13  | GISS       | GISS-E2-1-G   | NASA-GISS           | USA       |
| 14  | INM1       | INM-CM4-8     | INM                 | Russia    |
| 15  | INM2       | INM-CM5-0     | INM                 | Russia    |
| 16  | LPSL       | IPSL-CM6A-LR  | LPSL                | France    |
| 17  | MIR1       | MIROC6        | MIROC               | Japan     |
| 18  | MIR2       | MIROC-ES2L    | MIROC               | Japan     |
| 19  | MPI1       | MPI-ESM1-2-HR | MPI-M               | German    |
| 20  | MPI2       | MPI-ESM1-2-LR | MPI-M               | German    |
| 21  | MTIE       | MRI-ESM2-0    | MIR                 | Japan     |
| 22  | UKES       | UKESM1-0-LL   | MOHC                | UK        |
